# Supplementary material for: Sodium Meta-Arsenite Ameliorates Hyperglycemia in Obese Diabeticdb/dbMice by Inhibition of Hepatic Gluconeogenesis
Source: Hindawi journal article supplement (doi:10.1155/2014/961732), 2014-01-01
Supplement: f1 [file 961732.f1.pdf]

Supplement Fig. 1

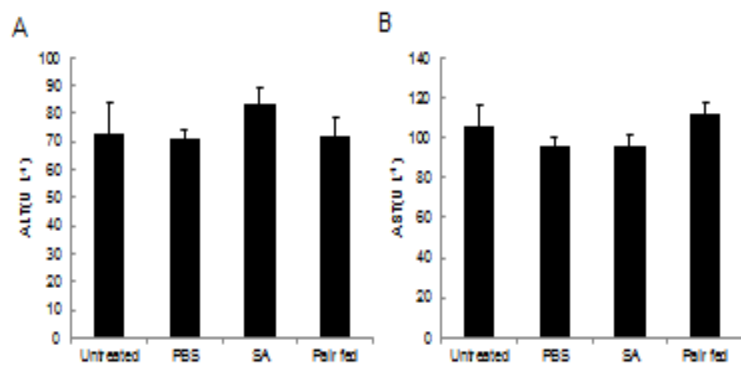

**Supplemental Fig. 1.** The concentration of ALT and AST in blood of SA-treated *db/db* mice. Diabetic *db/db* mice were orally intubated with SA (10 mg kg<sup>-1</sup> body weight/day) or PBS. At 8 weeks of SA treatment, the concentration of (A) ALT and (B) AST in the blood was measured (n=4-7 per group).

Supplement Fig. 2

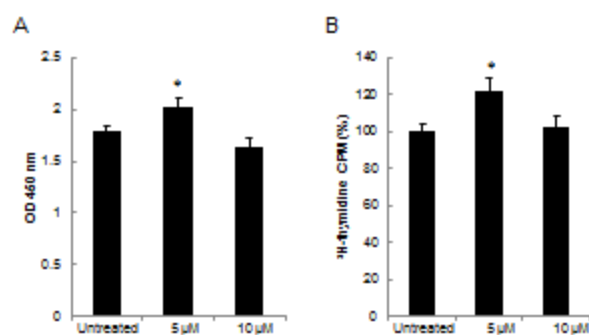

**Supplemental Fig. 2.** Proliferation induced in SA-treated mouse hepatocytes. (A) Hepatocytes isolated from C57BL/6 mice were incubated with 5 or 10 μM SA for 24 h, and cell toxicity was analyzed by CCK8 assay. (B) Hepatocytes were cultured for 24 h with 5 or 10 μM SA, and cell proliferation was measured by <sup>3</sup>H-thymidine incorporation assay. Data are mean ± SE from three independent experiments. \* P < 0.05 compared with untreated hepatocytes.

Supplement Fig. 3

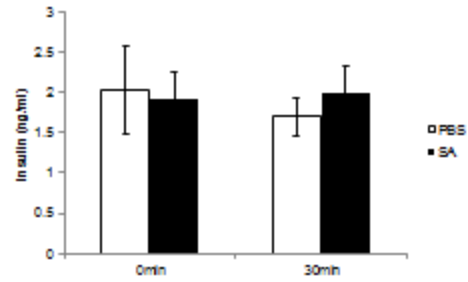

**Supplemental Fig. 3.** Glucose-stimulated insulin secretion test. After 8 weeks of SA treatment, db/db mice were not fed for 14 h, and then a glucose solution (2 g kg<sup>-1</sup> body weight) was injected intraperitoneally. Blood glucose levels were measured at 0 and 30 min after glucose injection. The concentration of serum insulin was measured by an ultrasensitive mouse insulin enzyme immunoassay kit (ALPCO, Windham, NH). Data are mean  $\pm$  SE (n=5 per group).
